# Supplementary material for: First Example of Cage P4N4-Macrocycle Copper Complexes with Intracavity Location of Unusual Cu2I Fragments
Source: MDPI journal article supplement (doi:10.3390/molecules28020680), 2023-01-09
Supplement: s1 [file s1]

#### Acquisition Parameter

|                   |             |              |           |                          |          |
|-------------------|-------------|--------------|-----------|--------------------------|----------|
| Ion Source Type   | ESI         | Ion Polarity | Positive  | Alternating Ion Polarity | off      |
| Mass Range Mode   | UltraScan   | Scan Begin   | 100 m/z   | Scan End                 | 2700 m/z |
| Capillary Exit    | 140.0 V     | n/a          | n/a       | Trap Drive               | 73.0     |
| Accumulation Time | 315 $\mu$ s | Averages     | 5 Spectra | Auto MS/MS               | off      |

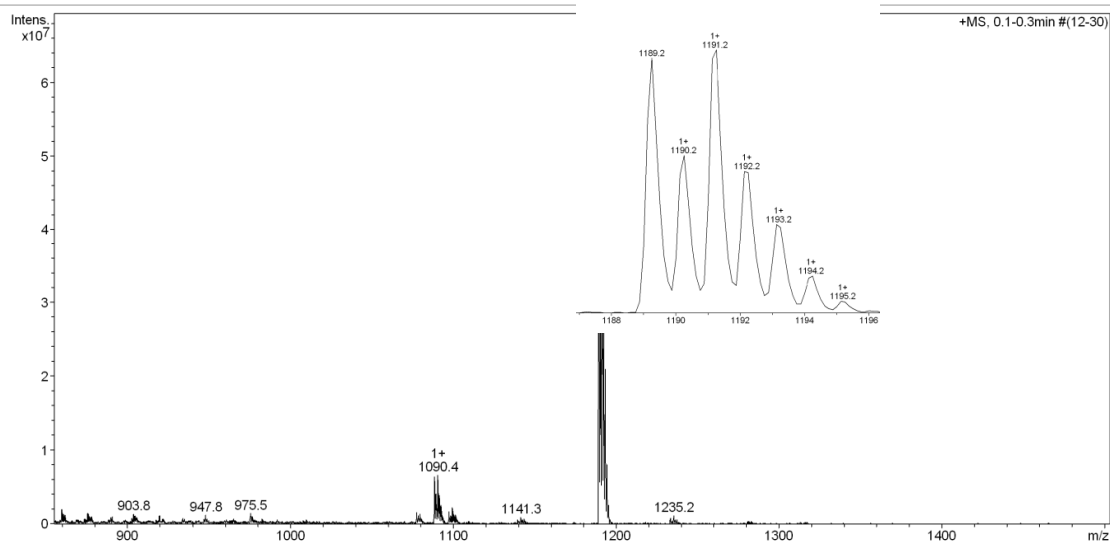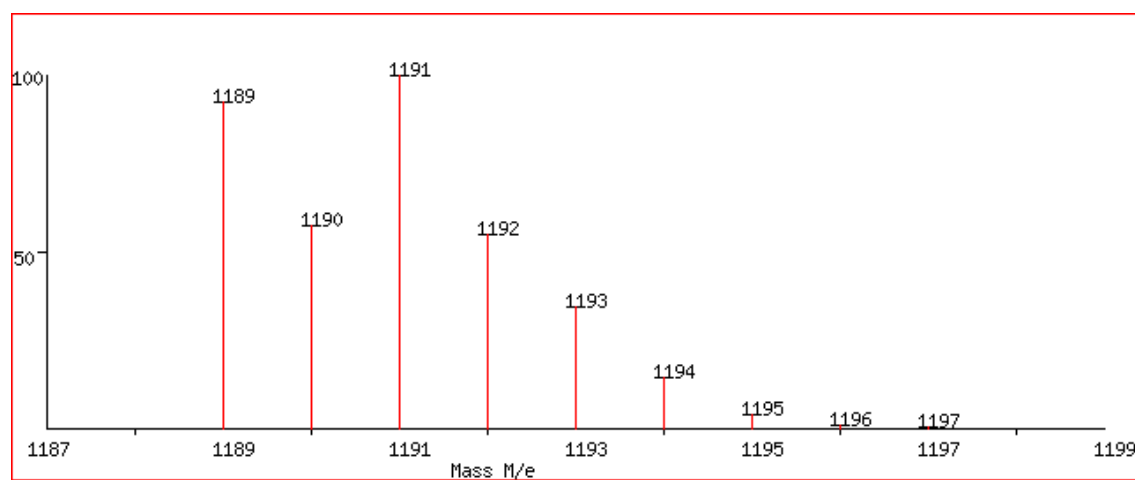

**Figure S1.** Experimental ESI mass-spectrum for complex **3**. Theoretical (bottom) isotope distributions of the pick  $[M-I]^+$  (calc. by <https://www.sisweb.com/mstools/isotope.htm> (accessed on 02 December 2022)).

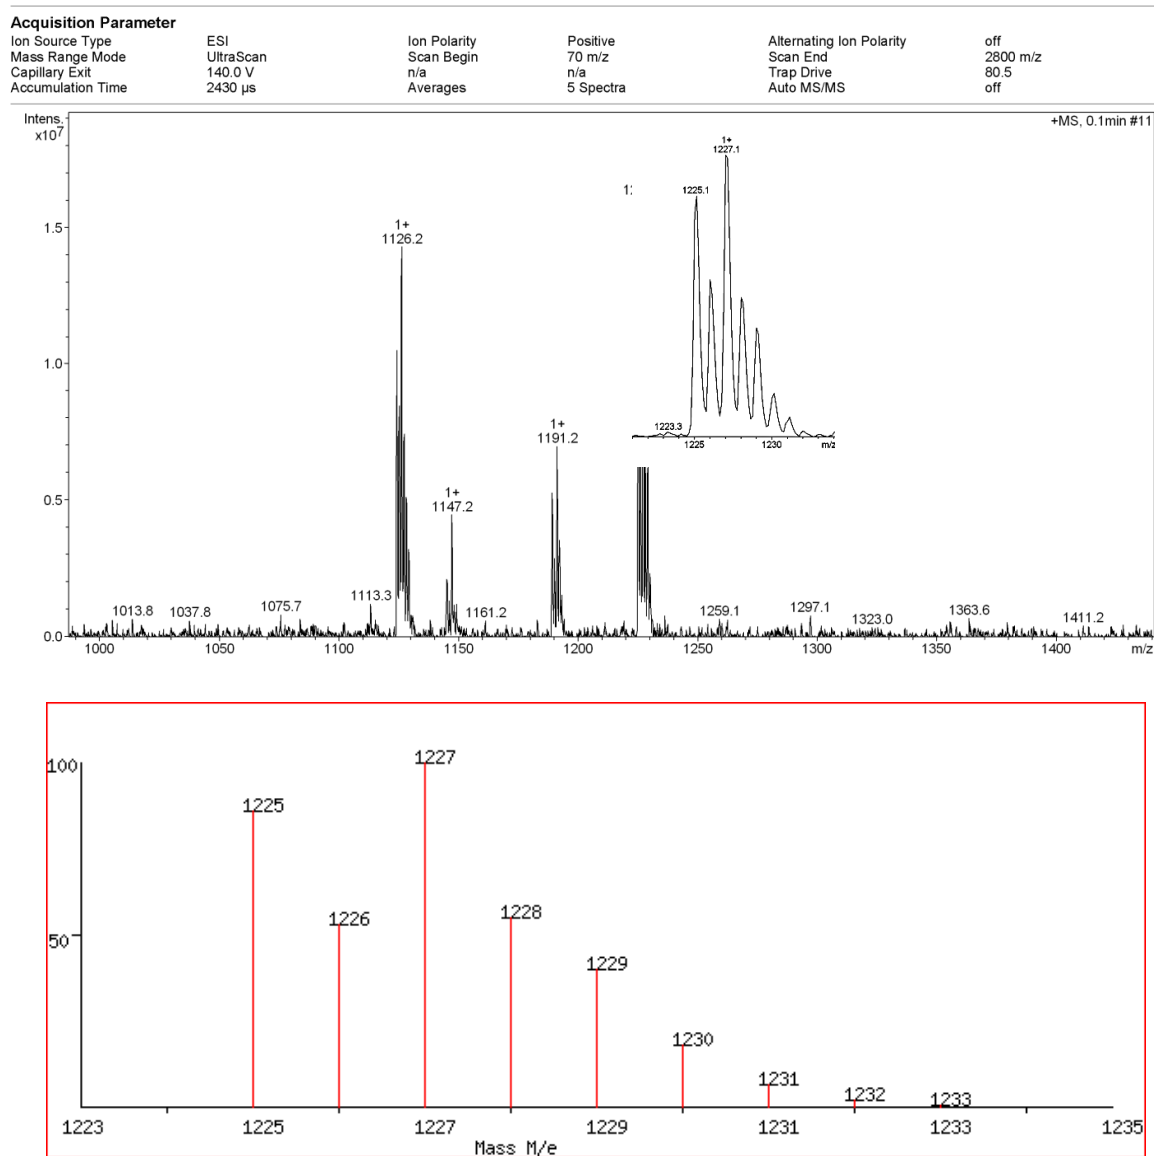

**Figure S2.** Experimental ESI mass-spectrum for complex **4**. Theoretical (bottom) isotope distributions of the pick  $[M-I]^+$  (calc. by <https://www.sisweb.com/mstools/isotope.htm> (accessed on 02 December 2022)).

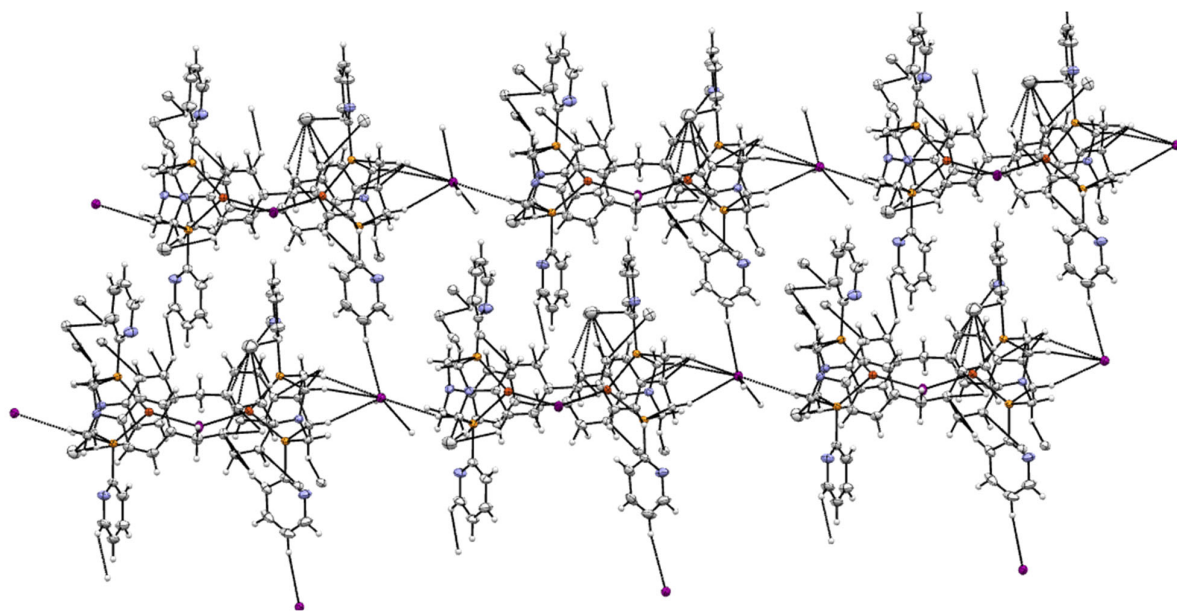

**Figure S3.** I...H-C-Contacts forming a supramolecular chain structure of complex 3.
